# Supplementary material
Source: PubMed Central journal article supplement (PMC7512158)
Supplement: JCM.00771-20-s0001.pdf [file JCM.00771-20-s0001.pdf]

**Supplemental Table.** *Campylobacter jejuni* strains isolated from human and puppy stool specimens during this outbreak and NCBI accession numbers of corresponding sequences.

| Strain       | Year of Isolation | Source | Biosample No. | SRR No.    |
|--------------|-------------------|--------|---------------|------------|
| 2016AY-0371  | 2016              | Human  | SAMN08098203  | SRR6354019 |
| 2017D-0132   | 2017              | Human  | SAMN07615386  | SRR6014503 |
| 2017D-0136   | 2017              | Puppy  | SAMN07504897  | SRR6171586 |
| 2017D-0138   | 2017              | Puppy  | SAMN07504895  | SRR6171584 |
| 2017D-0139   | 2017              | Puppy  | SAMN07504896  | SRR6171587 |
| 2017D-0140   | 2017              | Puppy  | SAMN07504898  | SRR6171583 |
| 2017D-0163   | 2017              | Puppy  | SAMN07674670  | SRR6171585 |
| 2017D-0180   | 2017              | Human  | SAMN07605519  | SRR6202903 |
| CFSAN069649  | 2017              | Puppy  | SAMN07710399  | SRR6080585 |
| CFSAN071607  | 2017              | Puppy  | SAMN08025804  | SRR6297976 |
| PNUSAC000260 | 2016              | Human  | SAMN05255135  | SRR3710099 |
| PNUSAC000392 | 2016              | Human  | SAMN04961828  | SRR3492160 |
| PNUSAC000643 | 2016              | Human  | SAMN05413992  | SRR3932384 |
| PNUSAC000960 | 2016              | Human  | SAMN05908962  | SRR4427165 |
| PNUSAC001027 | 2016              | Human  | SAMN06007277  | SRR5060317 |
| PNUSAC001091 | 2016              | Human  | SAMN06036245  | SRR5039804 |
| PNUSAC001449 | 2016              | Human  | SAMN06562215  | SRR5337178 |
| PNUSAC001462 | 2016              | Human  | SAMN06285341  | SRR5230136 |
| PNUSAC001641 | 2017              | Human  | SAMN06644938  | SRR5382106 |
| PNUSAC001644 | 2017              | Human  | SAMN06644941  | SRR5382101 |
| PNUSAC001816 | 2017              | Human  | SAMN06759833  | SRR5456705 |
| PNUSAC001817 | 2017              | Human  | SAMN06759834  | SRR5456706 |
| PNUSAC001842 | 2017              | Human  | SAMN07135004  | SRR5581839 |
| PNUSAC001921 | 2017              | Human  | SAMN07124712  | SRR5581935 |
| PNUSAC002416 | 2017              | Human  | SAMN07629386  | SRR6048525 |
| PNUSAC002518 | 2017              | Human  | SAMN07510040  | SRR5937917 |

|              |      |       |              |            |
|--------------|------|-------|--------------|------------|
| PNUSAC002574 | 2017 | Puppy | SAMN07504894 | SRR5935033 |
| PNUSAC002580 | 2017 | Puppy | SAMN07504900 | SRR5935048 |
| PNUSAC002743 | 2017 | Human | SAMN07646583 | SRR6048555 |
| PNUSAC002744 | 2017 | Human | SAMN07646584 | SRR6048556 |
| PNUSAC002880 | 2017 | Human | SAMN07761796 | SRR6152533 |
| PNUSAC002906 | 2017 | Human | SAMN07790191 | SRR6179762 |
| PNUSAC003024 | 2016 | Human | SAMN07837859 | SRR6232441 |
| PNUSAC003026 | 2016 | Human | SAMN07837861 | SRR6232434 |
| PNUSAC003029 | 2017 | Human | SAMN07837874 | SRR6232448 |
| PNUSAC003051 | 2016 | Human | SAMN07837858 | SRR6232430 |
| PNUSAC003081 | 2017 | Human | SAMN07988994 | SRR6313161 |
| PNUSAC003089 | 2016 | Human | SAMN07977045 | SRR6261379 |
| PNUSAC003152 | 2017 | Human | SAMN08014318 | SRR6289219 |
| PNUSAC003153 | 2017 | Human | SAMN08014319 | SRR6289213 |
| PNUSAC003169 | 2017 | Human | SAMN08016191 | SRR6289218 |
| PNUSAC003197 | 2017 | Human | SAMN08050098 | SRR6315881 |
| PNUSAC003228 | 2017 | Human | SAMN08135041 | SRR6353935 |
| PNUSAC003268 | 2017 | Human | SAMN08113727 | SRR6337383 |
| PNUSAC003286 | 2017 | Human | SAMN08115708 | SRR6337362 |
| PNUSAC003292 | 2017 | Human | SAMN08130249 | SRR6353934 |
| PNUSAC003325 | 2017 | Human | SAMN08114840 | SRR6337345 |
| PNUSAC003513 | 2017 | Puppy | SAMN08240012 | SRR6424098 |
| PNUSAC003525 | 2017 | Human | SAMN08285080 | SRR6439804 |
| PNUSAC003734 | 2018 | Human | SAMN08513612 | SRR6703680 |
| PNUSAC003753 | 2018 | Human | SAMN08556545 | SRR6741489 |
| PNUSAC003754 | 2018 | Puppy | SAMN08556540 | SRR6741488 |
| PNUSAC003758 | 2017 | Human | SAMN08517331 | SRR6706105 |
| PNUSAC003810 | 2018 | Human | SAMN08615568 | SRR6785781 |
| PNUSAC003814 | 2018 | Human | SAMN08729633 | SRR6856517 |
| PNUSAC003829 | 2018 | Human | SAMN08633868 | SRR6801479 |

---
